# Supplementary material for: Comprehensive Genomic Analysis of Marine Strain Streptomyces sp. 891, an Excellent Producer of Chrysomycin A with Therapeutic Potential
Source: MDPI journal article supplement (doi:10.3390/md20050287), 2022-04-24
Supplement: s1 [file s1]

# Comprehensive Genomic Analysis of One Marine Strain *Streptomyces* sp. 891, an Excellent Producer of Chrysomycin A with Therapeutic Potential

Xu Hu <sup>1,2,†</sup>, Yuqi Tang <sup>1,†</sup>, Yuanyuan Liu <sup>1</sup>, Xinwei Pei <sup>1</sup>, Ziwei Huang <sup>1</sup>, Fuxing Song <sup>3</sup> and Huawei Zhang <sup>1,\*</sup>

<sup>1</sup> School of Pharmaceutical Sciences, Zhejiang University of Technology, Hangzhou 310014, China

<sup>2</sup> College of Life and Environmental Sciences, Hangzhou Normal University, Hangzhou 311121, China

<sup>3</sup> School of Light Industry, Beijing Technology and Business University, Beijing 100048, China

\* Correspondence: hwzhang@zjut.edu.cn

† These authors contributed equally to this work.

**Table S1.** Information associated with the different chrysomycin (A)-producing species.

| Strain                                             | Source                                   | Yield of chrysomycin A | Ref.  |
|----------------------------------------------------|------------------------------------------|------------------------|-------|
| <i>Streptomyces</i> sp. A-419                      | Soil<br>(New York Botanical Garden, USA) | 5~10 mg/L              | [1]   |
| <i>Streptomyces virens</i>                         | Soil<br>(Russia)                         | /                      | [2]   |
| <i>Streptomyces albaduncus</i> C38291 (ATCC 14698) | Soil<br>(Colombia)                       | /                      | [3]   |
| <i>Streptomyces albaduncus</i> AD819               | Soil<br>(New York Botanical Garden, USA) | 3 mg/L                 | [4,5] |
| <i>Streptomyces sporoverrucosus</i> strain CR1     | Soil<br>(Jammu Hill, India)              | 5 mg/L                 | [6]   |
| <i>Streptomyces</i> sp.OA161                       | Mixed sample<br>(India)                  | /                      | [7]   |
| <i>Streptomyces</i> sp. 891                        | Sediment<br>(South China Sea)            | 3,600 mg/L             | [8]   |

**Table S2.** The statistical results of sequence-length distribution of the third-generation sequencing data of strain 891.

| Sample Name             | Sequence      |
|-------------------------|---------------|
| Total Number (#)        | 187,835       |
| Total Length (bp)       | 1,461,334,907 |
| Max Length (bp)         | 50,211        |
| Min Length (bp)         | 200           |
| N20 (bp)                | 12,425        |
| N50 (bp)                | 9,471         |
| N90 (bp)                | 5,502         |
| Sequences Number (≥1kb) | 180,244       |
| GC content %            | 68.87         |

**Table S3.** CRISPR arrays in strain 891.

| No. | Start     | End       | Number of Spacer | Length (bp) | Genome (%) |
|-----|-----------|-----------|------------------|-------------|------------|
| 1   | 7,701,174 | 7,702,715 | 23               | 1,541       | 0.0197     |
| 2   | 7,712,784 | 7,714,256 | 22               | 1,472       | 0.0189     |

|    |           |           |   |     |        |
|----|-----------|-----------|---|-----|--------|
| 3  | 3,190     | 3,397     | 3 | 207 | 0.0027 |
| 4  | 1,539,060 | 1,539,188 | 1 | 128 | 0.0016 |
| 5  | 1,796,106 | 1,796,192 | 1 | 86  | 0.0011 |
| 6  | 2,722,200 | 2,722,317 | 1 | 117 | 0.0015 |
| 7  | 2,734,535 | 2,734,645 | 1 | 110 | 0.0014 |
| 8  | 3,081,958 | 3,082,182 | 1 | 224 | 0.0029 |
| 9  | 3,235,213 | 3,235,352 | 1 | 139 | 0.0018 |
| 10 | 4,248,405 | 4,248,516 | 1 | 111 | 0.0014 |
| 11 | 5,500,464 | 5,500,577 | 1 | 113 | 0.0014 |
| 12 | 5,508,296 | 5,508,404 | 1 | 108 | 0.0014 |
| 13 | 5,661,901 | 5,662,010 | 1 | 109 | 0.0014 |
| 14 | 6,161,260 | 6,161,392 | 1 | 132 | 0.0017 |
| 15 | 6,347,661 | 6,347,778 | 1 | 117 | 0.0015 |

---

**Table S4.** Putative biosynthetic gene clusters (BGCs) coding for secondary metabolites in strain 891.

| BGC        | Core potentials           | From      | To        | Most similar known cluster (%)                         |
|------------|---------------------------|-----------|-----------|--------------------------------------------------------|
| Cluster 1  | thiopeptide, LAP          | 32,672    | 60,344    | -                                                      |
| Cluster 2  | Terpene, RiPP             | 268,772   | 300,586   | citrulassin E (66%)                                    |
| Cluster 3  | NRPS, NRPS-like           | 359,628   | 412,242   | enduracidin (8%)                                       |
| Cluster 4  | Terpene                   | 457,490   | 477,651   | -                                                      |
| Cluster 5  | ladderane, Other          | 571,337   | 612,704   | spiroindimicin/indimicin/lynamicin (6%)                |
| Cluster 6  | lanthipeptide             | 853,073   | 875,787   | SapB (75%)                                             |
| Cluster 7  | Terpene                   | 1,103,217 | 1,126,499 | hopene (61%)                                           |
| Cluster 8  | lanthipeptide             | 1,352,217 | 1,371,434 | -                                                      |
| Cluster 9  | RiPP-like                 | 1,693,792 | 1,704,652 | -                                                      |
| Cluster 10 | siderophore               | 1,873,704 | 1,887,891 | -                                                      |
| Cluster 11 | T3PKS, NRP                | 2,405,467 | 2,446,510 | echoside (35%)                                         |
| Cluster 12 | lassopeptide, RiPP        | 2,595,968 | 2,618,593 | aborycin (50%)                                         |
| Cluster 13 | NRPS, Other               | 2,758,394 | 2,801,884 | 2'-chloropentostatin / 2'-amino-2'-deoxyadenosine (6%) |
| Cluster 14 | Terpene                   | 3,273,143 | 3,295,228 | isorenieratene (85%)                                   |
| Cluster 15 | T1PKS, butyrolactone      | 5,346,521 | 5,395,065 | reveromycin A (15%)                                    |
| Cluster 16 | Terpene                   | 5,550,835 | 5,568,424 | geosmin (100%)                                         |
| Cluster 17 | lanthipeptide, Polyketide | 5,797,742 | 5,894,239 | xantholipin (61%)                                      |
| Cluster 18 | Ectoine                   | 6,022,782 | 6,031,572 | ectoine (100%)                                         |
| Cluster 19 | siderophore, Other        | 6,100,486 | 6,110,067 | desferrioxamine E (100%)                               |
| Cluster 20 | lanthipeptide             | 6,262,668 | 6,285,460 | -                                                      |
| Cluster 21 | T2PKS, Polyketide         | 6,529,403 | 6,601,876 | chrysomycin (74%)                                      |
| Cluster 22 | T1PKS, Polyketide         | 6,837,722 | 6,884,576 | marineosin (100%)                                      |
| Cluster 23 | NRPS-like                 | 7,073,517 | 7,115,564 | echoside (11%)                                         |
| Cluster 24 | NRPS-like, Saccharide     | 7,235,261 | 7,278,035 | paromomycin (5%)                                       |
| Cluster 25 | siderophore, Polyketide   | 7,302,042 | 7,318,494 | macrotetrolide (33%)                                   |
| Cluster 26 | NRPS                      | 7,519,764 | 7,606,851 | marformycin (8%)                                       |

**Table S5.** Putative function of Virulence Factors in strain 891.

| VFs               | VF_id     | VF_Funcation                                                                                                                                                                                                                             |
|-------------------|-----------|------------------------------------------------------------------------------------------------------------------------------------------------------------------------------------------------------------------------------------------|
| <i>KatA</i>       | VFG001861 | 1. A periplasmic catalase, expressed maximally during the post-exponential phase.<br>2. Important for intracellular survival and transmission.                                                                                           |
| <i>ClpC</i>       | VFG000079 | 1. An ATPase promoting early escape from the phagosome of macrophages.<br>2. ClpC is also required for adhesion and invasion, possibly by modulating the expression of InlA, InlB and ActA.                                              |
| <i>IdeR</i>       | VFG001406 | Repressor of iron acquisition genes, activator of iron storage genes and a positive regulator of oxidative stress responses.                                                                                                             |
| <i>RelA</i>       | VFG001826 | Associated with stationary phase adaptation and long-term survival.                                                                                                                                                                      |
| <i>Mycobactin</i> | VFG001818 | Cell-association mycobactin participates in iron internalization and/or to serve as a temporary iron-holding molecule to prevent sudden influx of excess iron if the metal suddenly becomes available after a period of iron limitation. |

## Reference

1. Strelitz, F.; Flon, H.; Asheshov, I.N. Chrysomycin: A New Antibiotic Substance for Bacterial Viruses. *J. Bacteriol.* **1955**, *69*, 280–283, doi:10.1128/jb.69.3.280-283.1955.
2. Gauze, G.F.; Sveshnikova, M.A.; Maksimova, T.S.; Ol'khovatova, O.L.; Bazhanov, V.S. Formation of New Antibiotic, Virenomycin, by a Culture of *Streptomyces virens* sp. nov. *Antibiotiki* **1977**, *22*, 963–967.
3. Matson, J.A.; Rose, W.C.; Bush, J.A.; Myllymaki, R.; Bradner, W.T.; Doyle, T.W. Antitumor Activity of Chrysomycins M and V. *J. Antibiot.* **1989**, *42*, 1446–1448, doi:10.7164/antibiotics.42.1446.
4. Carter, G.T.; Fantini, A.; James, J.C.; Borders, D.B.; White, R.J. Biosynthesis of Chrysomycins A and B Origin of the Chromophore. *J. Antibiot.* **1985**, *38*, 242–248, doi:10.7164/antibiotics.38.242.
5. Kharel, M.K.; Nybo, S.E.; Shepherd, M.D.; Rohr, J. Cloning and Characterization of the Ravidomycin and Chrysomycin Biosynthetic Gene Clusters. *ChemBioChem* **2010**, *11*, 523–532, doi:10.1002/cbic.200900673.
6. Jain, S.K.; Pathania, A.S.; Parshad, R.; Raina, C.; Ali, A.; Gupta, A.P.; Kushwaha, M.; Aravinda, S.; Bhushan, S.; Bharate, S.B.; et al. Chrysomycins A–C, Antileukemic Naphthocoumarins from *Streptomyces Sporoverrucosus*. *RSC Adv.* **2013**, *3*, 21046, doi:10.1039/c3ra42884b.
7. Muralikrishnan, B.; Dan, V.M.; Vinodh, J.S.; Jamsheena, V.; Ramachandran, R.; Thomas, S.; Dastager, S.G.; Kumar, K.S.; Lankalapalli, R.S.; Kumar, R.A. Anti-Microbial Activity of Chrysomycin A Produced by *Streptomyces* sp. against *Mycobacterium Tuberculosis*. *RSC Adv.* **2017**, *7*, 36335–36339, doi:10.1039/C7RA05576E.
8. Ni, H.-J.; Lv, S.-Y.; Sheng, Y.-T.; Wang, H.; Chu, X.-H.; Zhang, H.-W. Optimization of Fermentation Conditions and Medium Compositions for the Production of Chrysomycin A by a Marine-Derived Strain *Streptomyces* sp. 891. *Prep. Biochem. Biotechnol.* **2021**, *51*, 998–1003, doi:10.1080/10826068.2021.1885046.
